# Supplementary material for: No evidence that carotenoid pigments boost either immune or antioxidant defenses in a songbird
Source: PubMed Central journal article supplement (PMC5799171; doi:10.1038/s41467-018-02974-x), 2018-02-05
Supplement: 41467_2018_2974_MOESM1_ESM.pdf [file 41467_2018_2974_MOESM1_ESM.pdf]

## **SUPPLEMENTARY INFORMATION**

No evidence that carotenoid pigments boost either immune or antioxidant defenses in a songbird

Koch et al.

*Nature Communications*

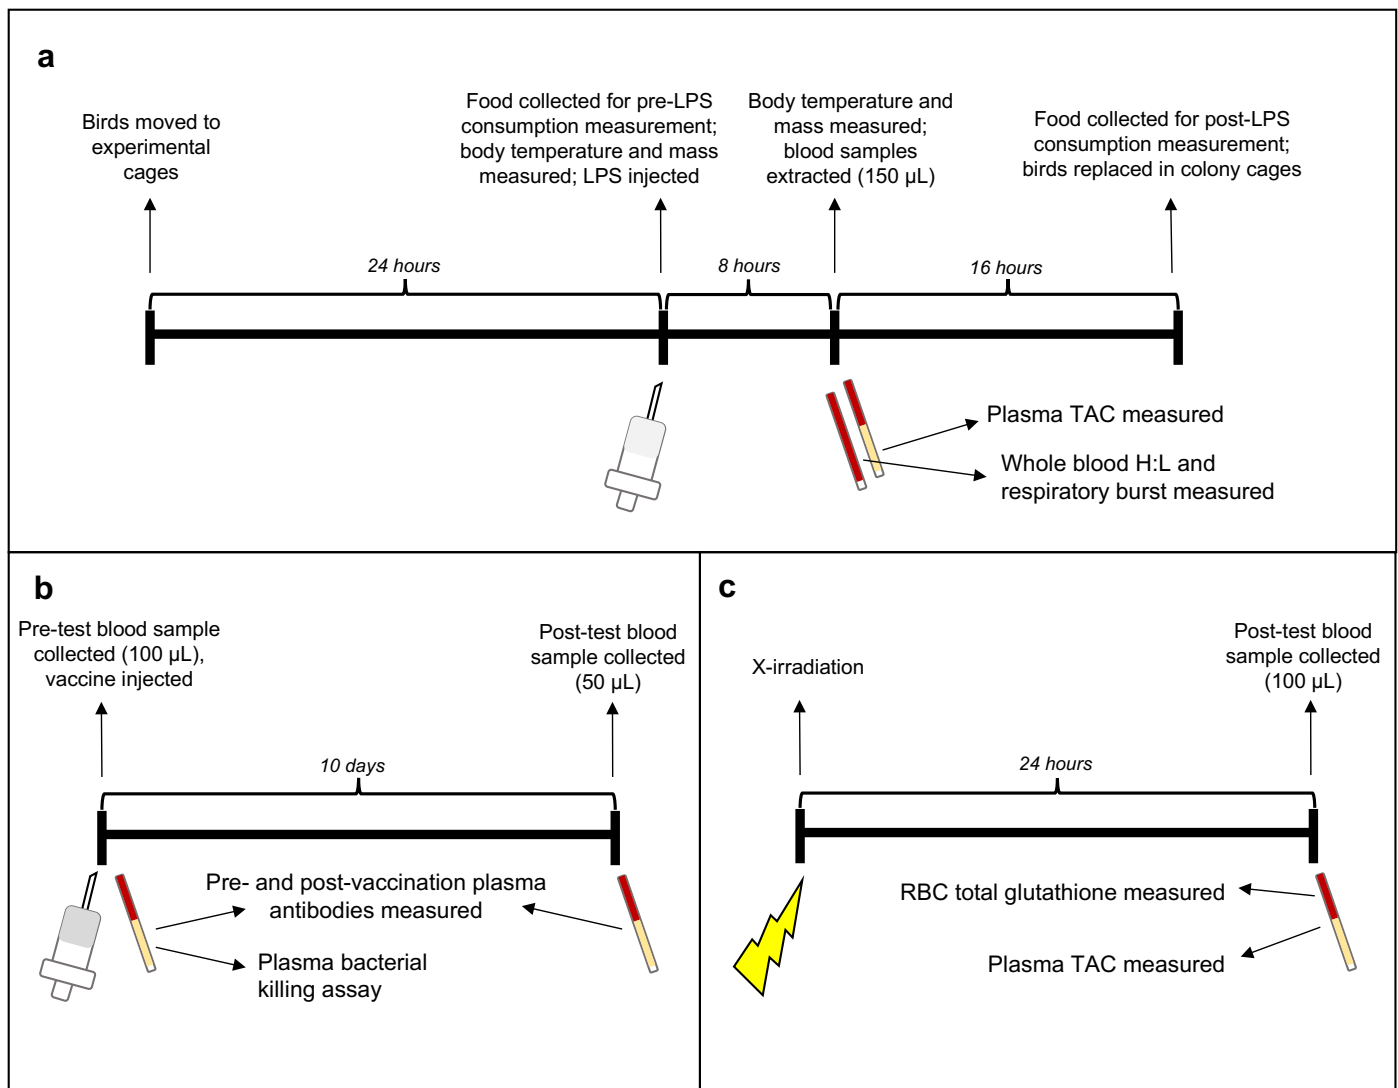

**Supplementary Figure 1** Timelines of the three main experimental manipulations and sample collection periods. **a** LPS injection in July-early August 2016, **b** BKA and vaccination in late August 2016, and **c** irradiation in December 2016. At least four weeks elapsed between each experimental segment.

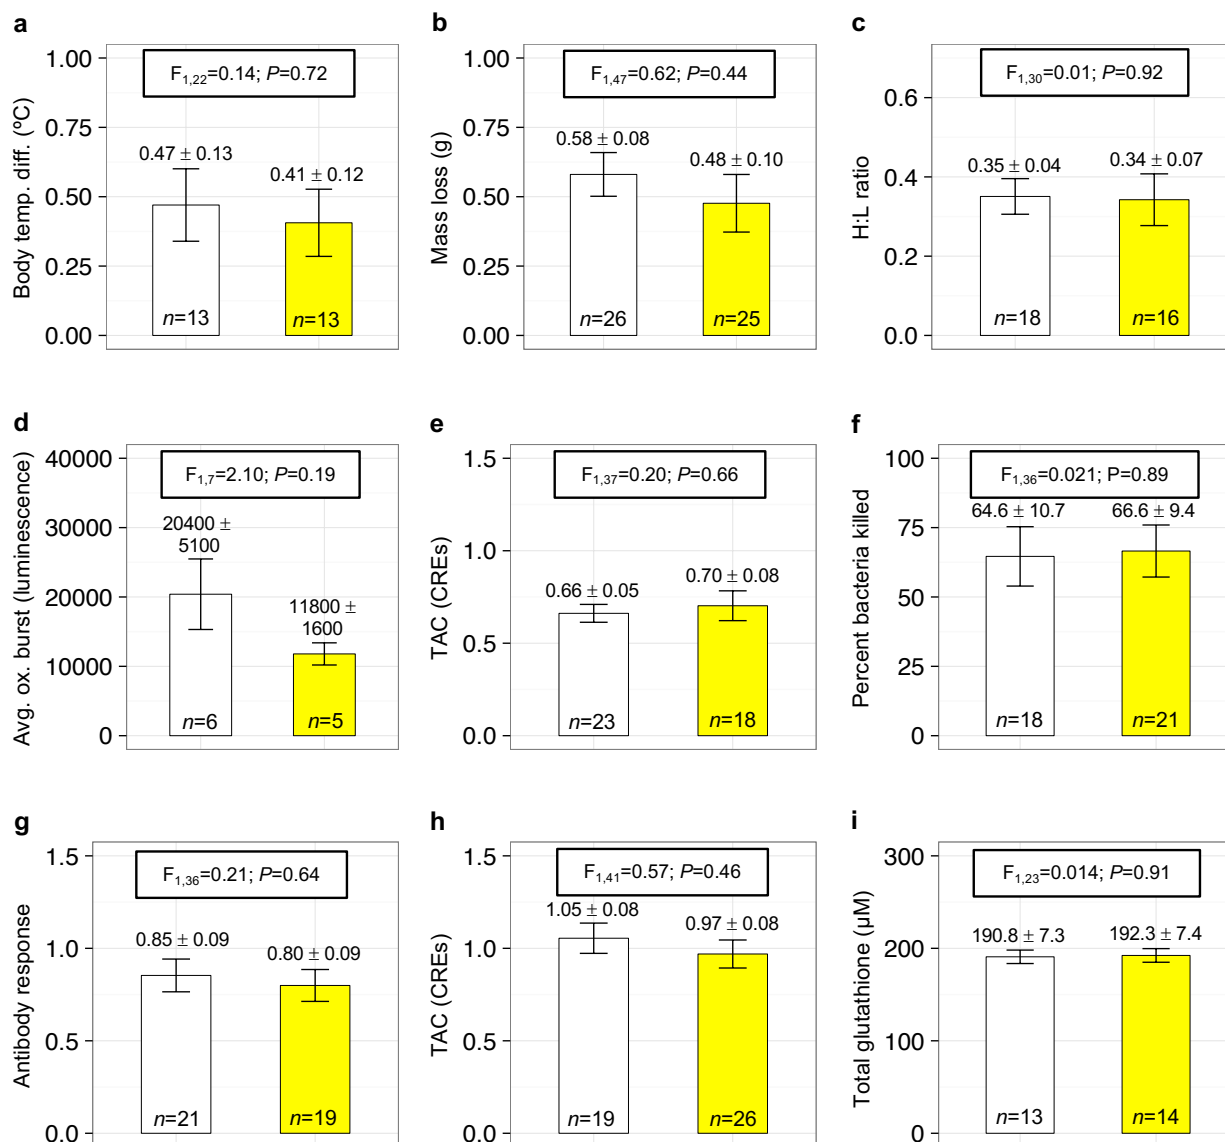

**Supplementary Figure 2** Average response ( $\pm$  SEM) of white recessive (WR) and yellow (Y) canaries for a variety of physiological measurements. **a, b** Body temperature (**a**) and mass (**b**) changes in response to LPS, comparing baseline measures to those taken 8 hours after injection. **c** Heterophil to lymphocyte ratio measures on blood smears taken 8 hours after LPS injection. **d** Average oxidative burst response over a one-minute sampling period on red blood cells extracted 8 hours after LPS injection. **e** Total antioxidant capacity in plasma sampled 8 hours after LPS injection. **f** Percent *E. coli* killed in plasma samples relative to positive controls. **g** Average anti-tetanus antibody response (in units of log-transformed milli-optical-density per minute)

measured in plasma samples extracted ten days after tetanus vaccination. **h, i** Total antioxidant capacity (**h**) and total glutathione (**i**) measured in blood samples extracted 24 hours after radiation oxidative challenge. F and *P* values correspond to ANOVA results testing for a significant effect of canary color type (WR vs. Y) on results.

| Category                               | Measurement                                  | Sample sizes                                  | Variable  | F        | P     |
|----------------------------------------|----------------------------------------------|-----------------------------------------------|-----------|----------|-------|
| Pre- and post-LPS                      | Baseline mass                                | 26 WR<br>(16 M, 10 F);<br>25 Y                | Color     | 8.92     | 0.004 |
|                                        |                                              |                                               | Sex       | 1.02     | 0.32  |
|                                        |                                              |                                               | Color*Sex | 0.24     | 0.63  |
|                                        | Change in mass                               | (17 M, 8 F)                                   | Color     | 0.62     | 0.44  |
|                                        |                                              |                                               | Sex       | 0.01     | 0.91  |
|                                        |                                              |                                               | Color*Sex | 0.14     | 0.71  |
|                                        | Baseline food consumption                    | 26 WR<br>(16 M, 10 F);<br>22 Y                | Color     | 0.60     | 0.44  |
|                                        |                                              |                                               | Sex       | 3.27     | 0.08  |
|                                        |                                              |                                               | Color*Sex | 1.23     | 0.27  |
|                                        | Change in food consumption                   | (15 M, 6 F)                                   | Color     | 2.27     | 0.14  |
|                                        |                                              |                                               | Sex       | 1.84     | 0.18  |
|                                        |                                              |                                               | Color*Sex | 2.56     | 0.12  |
|                                        | Baseline body temperature                    | 13 WR<br>(8 M, 5 F);<br>13 Y                  | Color     | 2.52     | 0.13  |
|                                        |                                              |                                               | Sex       | 0.06     | 0.81  |
| Color*Sex                              |                                              |                                               | 0.17      | 0.68     |       |
| Change in body temperature             | (6 F, 7 M)                                   | Color                                         | 0.14      | 0.72     |       |
|                                        |                                              | Sex                                           | 2.46      | 0.13     |       |
|                                        |                                              | Color*Sex                                     | 0.63      | 0.44     |       |
| Total antioxidant capacity             | 23 WR<br>(14 M, 9 F);<br>18 Y<br>(13 M, 5 F) | Color                                         | 0.20      | 0.66     |       |
|                                        |                                              | Sex                                           | 0.78      | 0.38     |       |
|                                        |                                              | Color*Sex                                     | 0.07      | 0.79     |       |
| Respiratory burst peak luminescence    | 6 WR<br>(3 M, 3 F);<br>5 Y                   | Color                                         | 1.45      | 0.27     |       |
|                                        |                                              | Sex                                           | 0.34      | 0.58     |       |
|                                        |                                              | Color*Sex                                     | 0.09      | 0.77     |       |
| Respiratory burst average luminescence | (3 M, 2 F)                                   | Color                                         | 2.10      | 0.19     |       |
|                                        |                                              | Sex                                           | 1.13      | 0.32     |       |
|                                        |                                              | Color*Sex                                     | 0.45      | 0.52     |       |
| Heterophil:lymphocyte ratio            | 18 WR<br>(11 M, 7 F);<br>16 Y<br>(11 M, 5 F) | Color                                         | 0.01      | 0.92     |       |
|                                        |                                              | Sex                                           | 0.007     | 0.94     |       |
|                                        |                                              | Color*Sex                                     | 1.01      | 0.32     |       |
| Vaccination                            | Anti-tetanus secondary antibody response     | 23 WR<br>(13 M, 8 F);<br>21 Y<br>(13 M, 6 F)  | Color     | 0.21     | 0.65  |
|                                        |                                              | Sex                                           | 4.05      | 0.05     |       |
|                                        |                                              | Color*Sex                                     | 2.35      | 0.13     |       |
| Bacterial killing assay                | Factorial bacterial killing (binomial)       | 18 WR<br>(9 F, 9 M);<br>22 Y<br>(15 M, 7 F)   | Intercept | z=0.33   | 0.74  |
|                                        |                                              |                                               | Color     | z=0.007  | 0.99  |
|                                        |                                              |                                               | Sex       | z=0.99   | 0.33  |
|                                        | Percent bacterial killing (ANOVA)            | (15 M, 7 F)                                   | Color*Sex | z=-0.008 | 0.99  |
|                                        |                                              |                                               | Color     | 0.02     | 0.89  |
| Sex                                    | 0.61                                         | 0.44                                          |           |          |       |
| Post-radiation                         | Total antioxidant capacity                   | 19 WR<br>(11 M, 8 F);<br>26 Y<br>(15 M, 11 F) | Color     | 0.57     | 0.46  |
|                                        |                                              |                                               | Sex       | 0.29     | 0.59  |
|                                        |                                              |                                               | Color*Sex | 1.64     | 0.21  |
|                                        | Total glutathione                            | 13 WR<br>(8 M, 5 F);<br>14 Y<br>(7 M, 7 F)    | Color     | 0.01     | 0.91  |
|                                        |                                              |                                               | Sex       | 5.53     | 0.03  |
| Color*Sex                              | 1.60                                         | 0.22                                          |           |          |       |

**Supplementary Table 1** Physiological measurement statistical analysis results. Results of ANOVAs investigating the effects of sex, color, and their interaction on response variables.

Mass, body temperature, and food consumption measurement statistical analyses include tests for whether WR and Y canaries differed in either baseline measurements or in magnitude of measurement change in response to LPS injection. For the bacterial killing assay, results were analyzed both with ANOVA (comparing percent bacteria killed) and with a binomial linear model (grouping results into bins of “fully-killed” or “failed-to-kill”); for the binomial model results, z values are presented in lieu of F statistics.
